# Supplementary material for: Population and Noncompartmental Pharmacokinetics of Sodium Oxybate Support Weight‐Based Dosing in Children and Adolescents With Narcolepsy With Cataplexy
Source: PubMed Central journal article supplement — Clin Transl Sci. 2020 Apr 18;13(5):932–40. doi: 10.1111/cts.12780 (PMC7485950; doi:10.1111/cts.12780), 2020-04-18
Supplement: CTS-13-932-s001.pdf [file CTS-13-932-s001.pdf]

**Figure S1.** Population PK model schema.

Dose (oral)

$K_a$ , first-order absorption,  
varies with fed state

Central Compartment (Plasma):  
Volume scales with weight  
(allometric) and varies with  
age category

Peripheral  
Compartment

Michaelis-Menten Clearance ( $V_{max}$  and  $K_m$ ):  
 $V_{max}$  varies with weight, age category, and  
time of day (AM vs PM)

$K_a$ , absorption rate constant;  $K_m$ , concentration at half  $V_{max}$ ; PK, pharmacokinetics;  
 $V_{max}$ , maximum velocity at very high concentration of the substrate.
