# Supplementary material for: Population and Noncompartmental Pharmacokinetics of Sodium Oxybate Support Weight‐Based Dosing in Children and Adolescents With Narcolepsy With Cataplexy
Source: PubMed Central journal article supplement — Clin Transl Sci. 2020 Apr 18;13(5):932–40. doi: 10.1111/cts.12780 (PMC7485950; doi:10.1111/cts.12780), 2020-04-18
Supplement: CTS-13-932-s002.pdf [file CTS-13-932-s002.pdf]

**Figure S2.** Population PK **(A)** visual predictive checks and **(B)** goodness of fit plots.

**A**

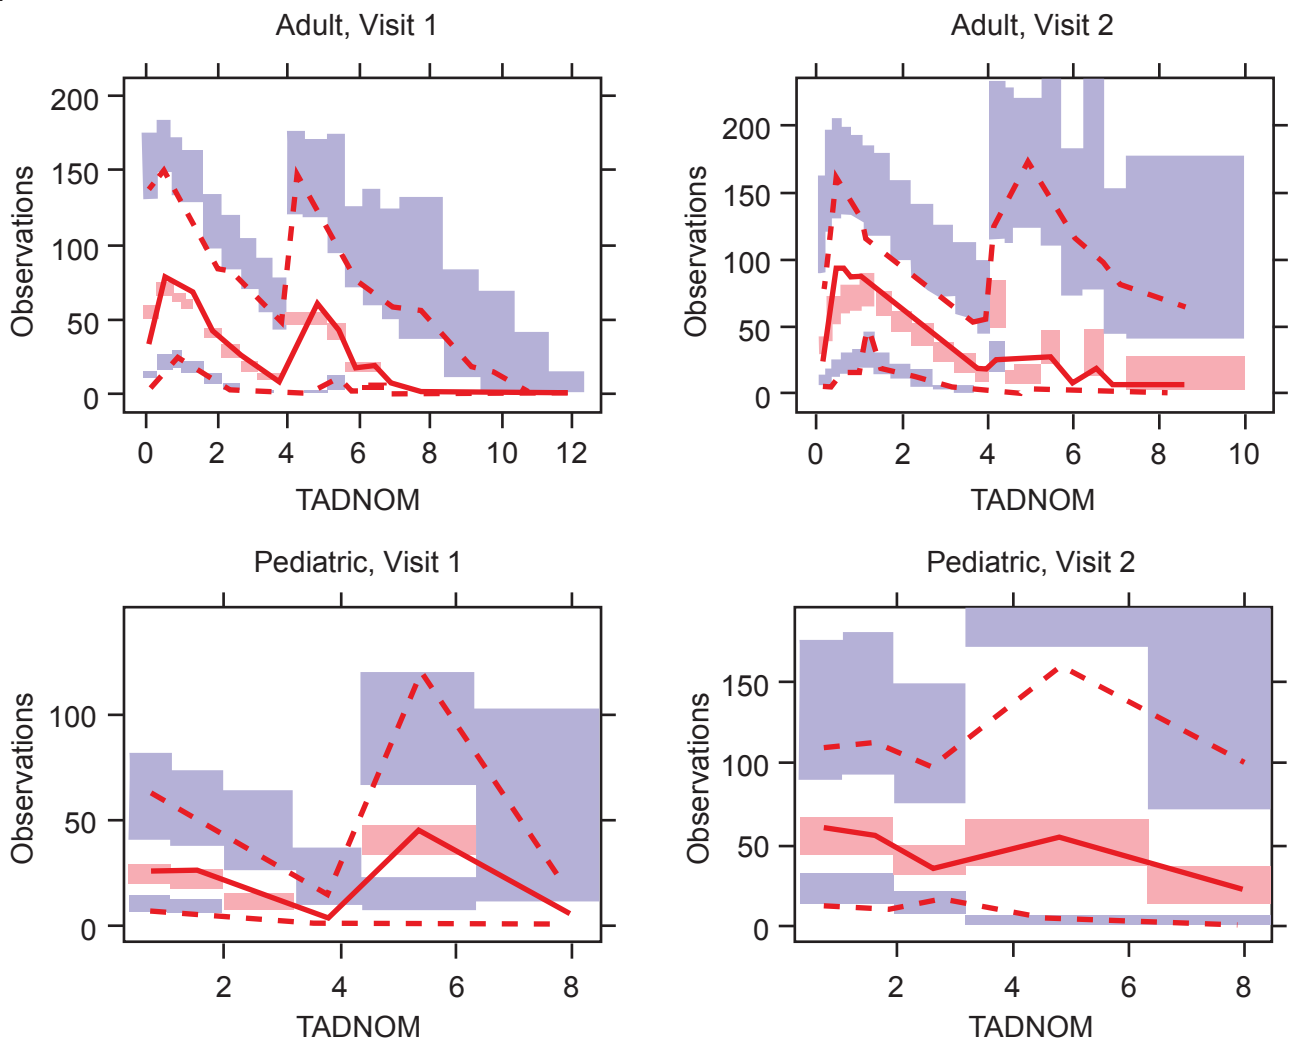

**B**

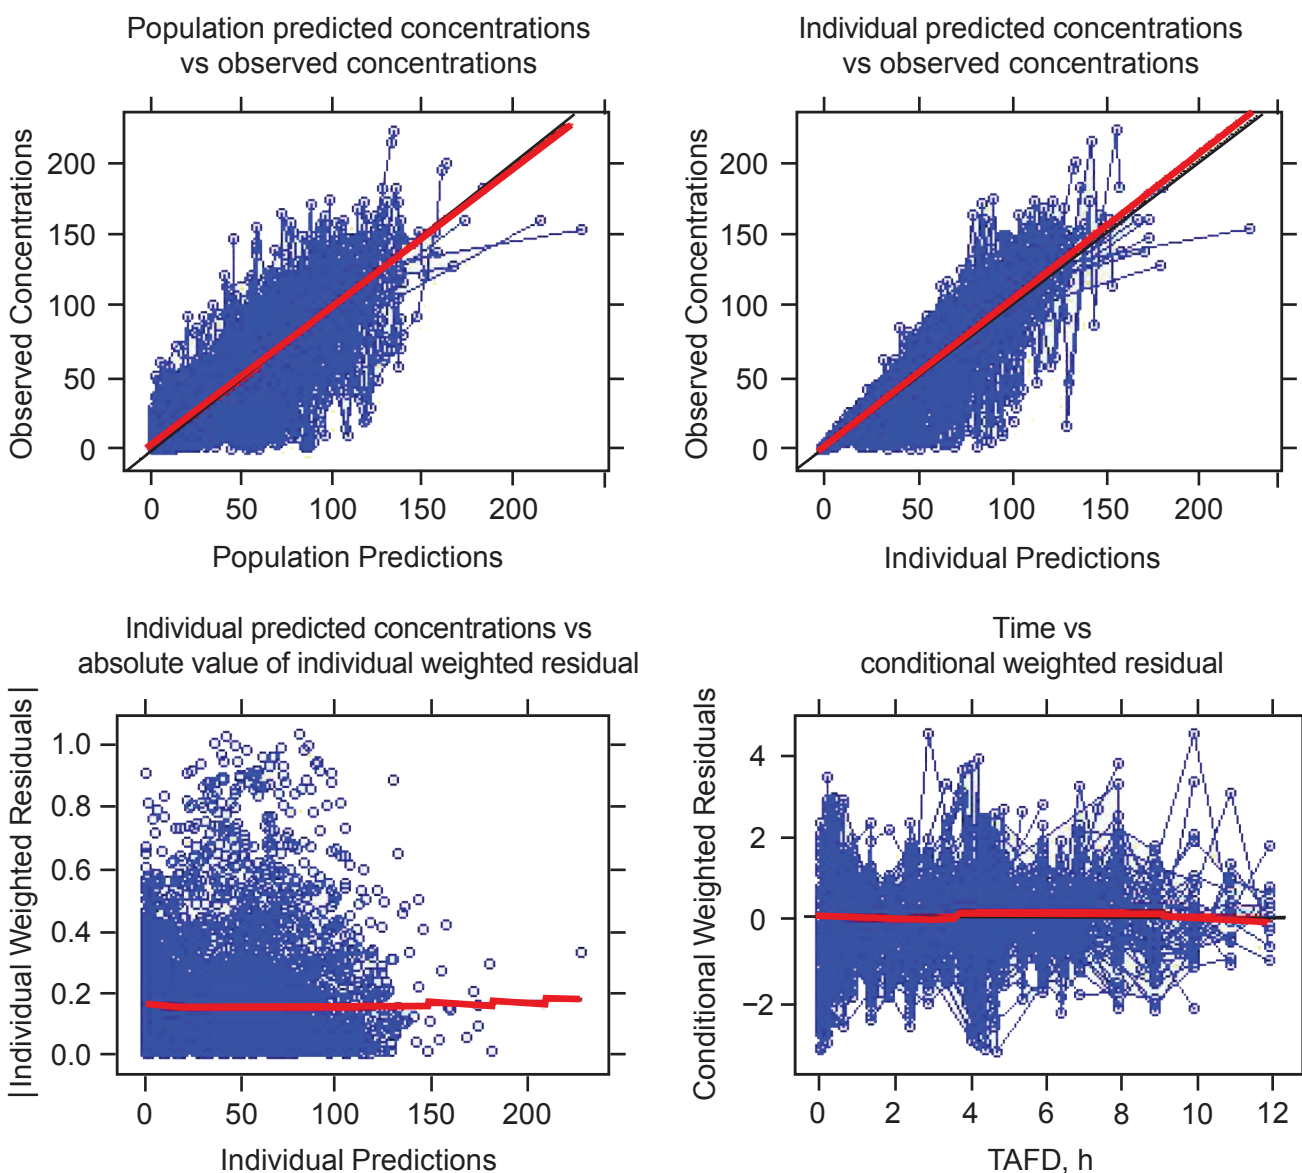

Population PK: **(A)** visual predictive checks and **(B)** goodness of fit plots. In panel A, the y-axis represents the concentration of SXB in units of  $\mu\text{g/mL}$ , the solid red line represents the median of the observed data vs TADNOM, the dashed red line represents the upper and lower 95% range for the observed data, the red shaded area represents the 95% PI for the median (based on the simulations), and the blue shaded area represents the 95% PI for the upper and lower 95% range of the simulated data; visit 1 is PK night 1 in the pediatric study and the first period for the adult studies, whereas visit 2 is PK night 2 in the pediatric study and the second period for the adult studies. In panel B, the solid red line represents the fit by locally estimated scatterplot smoothing. PI, prediction interval; SXB, sodium oxybate; TADNOM, nominal time after dose; TAFD, elapsed numerical time from the first dose of each treatment.
