# Supplementary material for: Population and Noncompartmental Pharmacokinetics of Sodium Oxybate Support Weight‐Based Dosing in Children and Adolescents With Narcolepsy With Cataplexy
Source: PubMed Central journal article supplement — Clin Transl Sci. 2020 Apr 18;13(5):932–40. doi: 10.1111/cts.12780 (PMC7485950; doi:10.1111/cts.12780), 2020-04-18
Supplement: CTS-13-932-s003.pdf [file CTS-13-932-s003.pdf]

**Figure S3.** Representative sample of observed plasma oxybate concentrations vs values predicted by the population PK model in individual study participants.

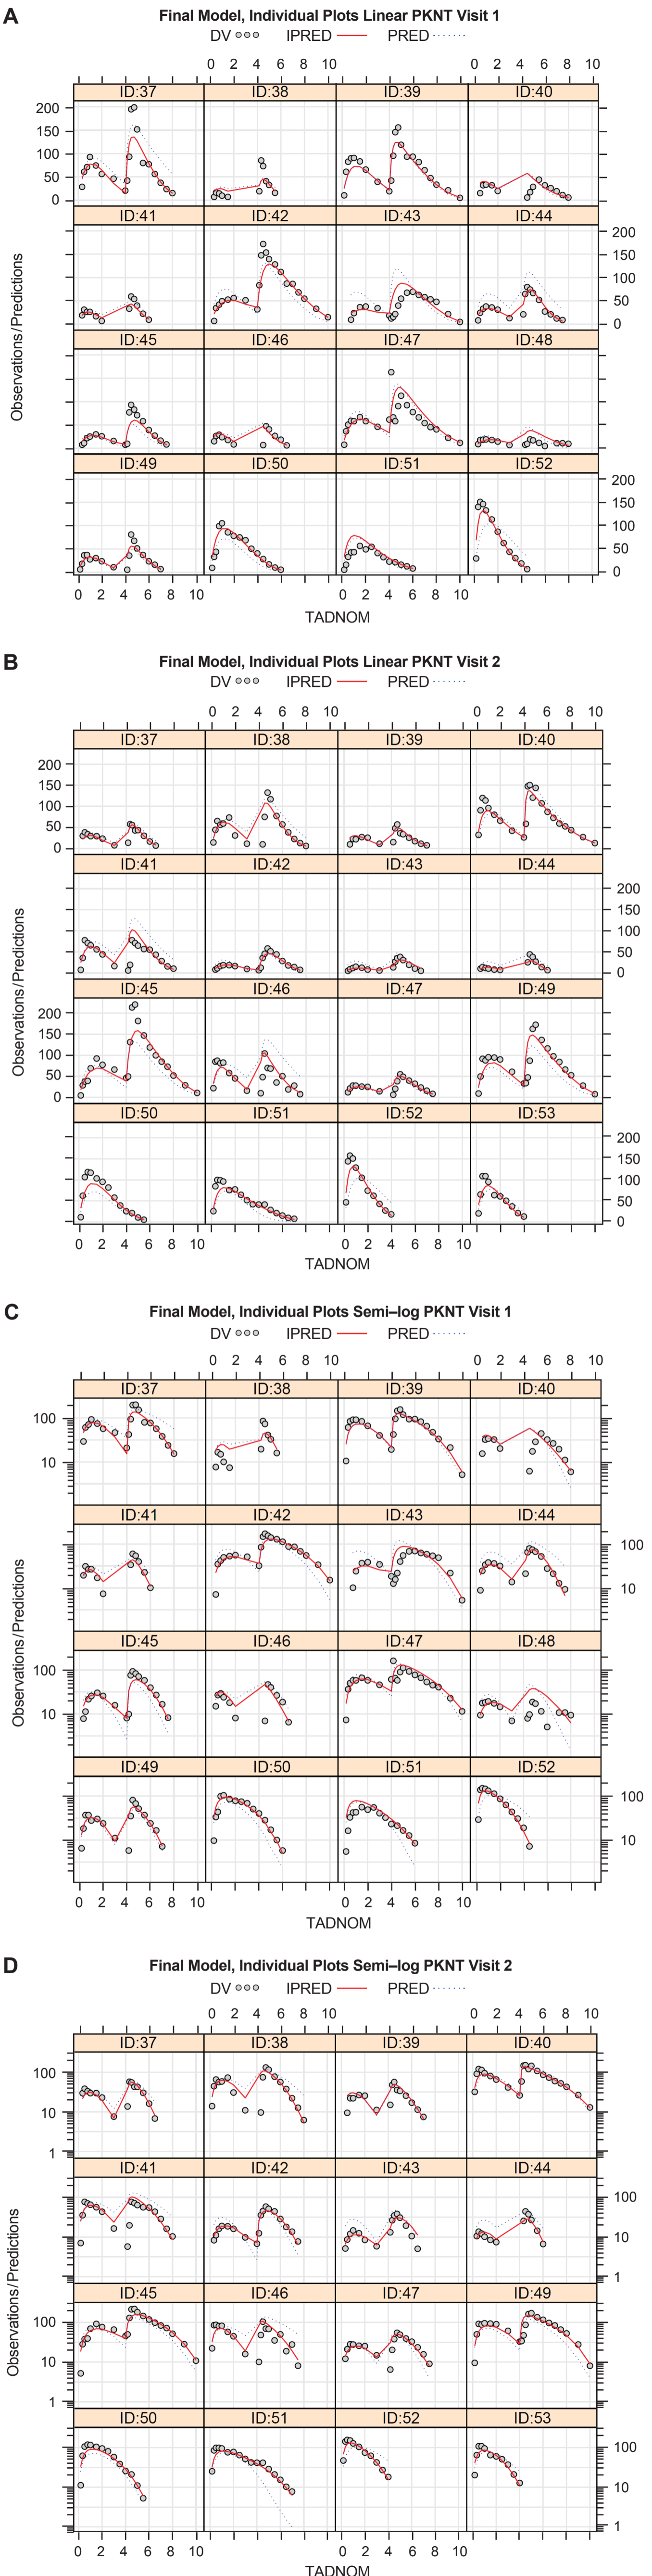

Representative sample of observed plasma oxybate concentrations vs values predicted by the population PK model in individual study participants:

(A) linear plots from PK visit 1, (B) linear plots from PK visit 2, (C) semilog plots from PK visit 1, and (D) semilog plots from PK visit 2. The y-axis represents the concentration of SXB in units of  $\mu\text{g/mL}$ . Visit 1 is PK night 1 in the pediatric study and the first period for the adult studies, whereas visit 2 is PK night 2 in the pediatric study and the second period for the adult studies. DV (open black circles), observed data value for concentration of oxybate; ID, participant identification number; IPRED (solid red line), individual predicted value for concentration of oxybate; PK, pharmacokinetics; PKNT, nominal time for PK samples; PRED (dashed blue line), population predicted value for concentration of oxybate; SXB, sodium oxybate; TADNOM, nominal time after dose.
