# Supplementary material for: Population and Noncompartmental Pharmacokinetics of Sodium Oxybate Support Weight‐Based Dosing in Children and Adolescents With Narcolepsy With Cataplexy
Source: PubMed Central journal article supplement — Clin Transl Sci. 2020 Apr 18;13(5):932–40. doi: 10.1111/cts.12780 (PMC7485950; doi:10.1111/cts.12780), 2020-04-18
Supplement: CTS-13-932-s004.pdf [file CTS-13-932-s004.pdf]

**Figure S4.** Simulated SXB exposure in pediatric and adult participants by mg/kg dosage.

**A**

$C_{\max 1}$  vs dose in mg/kg

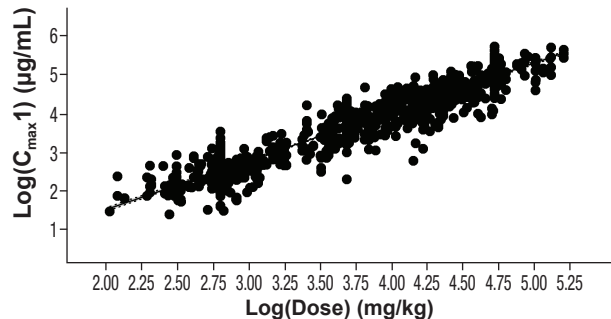

$Y = -0.719 + 1.19 \cdot X$ . 90% CI of slope = (1.17, 1.21).  
SE of slope = 0.0143. SD of residual error = 0.326.

**B**

$C_{\max 2}$  vs dose in mg/kg

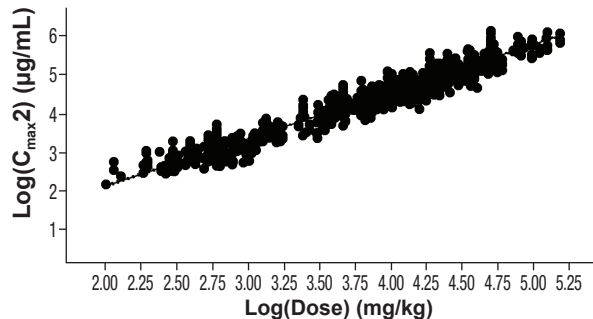

$Y = -0.326 + 1.24 \cdot X$ . 90% CI of slope = (1.23, 1.26).  
SE of slope = 0.0106. SD of residual error = 0.242.

**C**

$AUC_{\text{inf}}$  vs dose in mg/kg

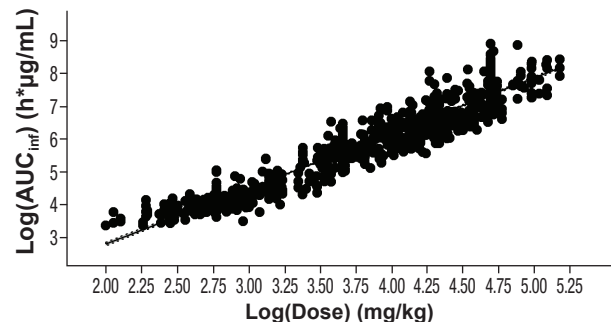

$Y = -0.609 + 1.68 \cdot X$ . 90% CI of slope = (1.65, 1.71).  
SE of slope = 0.018. SD of residual error = 0.41.

**D**

$AUC_{0-24\text{h}}$  vs dose in mg/kg

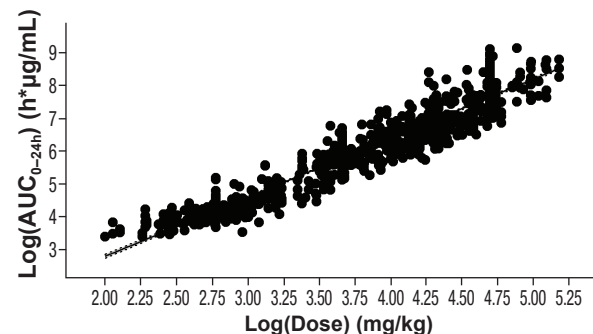

$Y = -0.605 + 1.68 \cdot X$ . 90% CI of slope = (1.65, 1.71).  
SE of slope = 0.0179. SD of residual error = 0.408.

The black circles denote individual simulated values from log transformation. The solid lines denote linear regression of log-transformed data.  $AUC_{\text{inf}}$ , area under the concentration-time curve from 0 to infinity;  $AUC_{0-24\text{h}}$ , area under the concentration-time curve from 0 to 24 hours;  $C_{\max}$ , maximal concentration; SXB, sodium oxybate.
